# Supplementary material for: Selenium and the 15kDa Selenoprotein Impact Colorectal Tumorigenesis by Modulating Intestinal Barrier Integrity
Source: Int J Mol Sci. 2021 Sep 30;22(19):10651. doi: 10.3390/ijms221910651 (PMC8508755; doi:10.3390/ijms221910651)
Supplement: Supplementary file 1 [file ijms-22-10651-s001.zip]

Archive with 8 entries (8 files):
- Supplementary Figures S1-S8/Figure S1.pdf
- Supplementary Figures S1-S8/Figure S2.pdf
- Supplementary Figures S1-S8/Figure S3.pdf
- Supplementary Figures S1-S8/Figure S4.pdf
- Supplementary Figures S1-S8/Figure S5.pdf
- Supplementary Figures S1-S8/Figure S6.pdf
- Supplementary Figures S1-S8/Figure S7.pdf
- Supplementary Figures S1-S8/Figure S8.pdf
